# Supplementary material for: Simultaneous Detection of SARS-CoV-2 and Influenza Virus in Wastewater of Two Cities in Southeastern Germany, January to May 2022
Source: MDPI journal article supplement (doi:10.3390/ijerph192013374), 2022-10-17

**Table S1.** Primer used for characterization of influenza virus A/B in real-time PCR-positive wastewater samples.

| <b>Virus</b>  | <b>Gene</b>    | <b>Name</b> | <b>Description</b>    | <b>Sequence (5' - 3')</b>          | <b>Product size</b> | <b>Source</b> |
|---------------|----------------|-------------|-----------------------|------------------------------------|---------------------|---------------|
| Influenza A/B | Matrix protein | InflA/Bf    | Re-amplification      | GGA GAA GGC AAA GCA GAA CTA G      | 107 bp              | This study    |
|               |                | InflA/Br    | of product of RT qPCR | GCA TCT TTT GTT TTT TAT CCA TTC    |                     | This study    |
| Influenza A   | Matrix protein | MF1MR1027f  | First PCR             | AGC AAA AGC AGG TAG ATA TTG AAA GA | 1,027 bp            | WHO (2021)    |
|               |                | MF1MR1027r  | First/seminested PCR  | AGT AGA AAC AAG GTA GTT TTT TAC TC |                     | WHO (2021)    |
|               |                | MF1MR1027fn | Seminested PCR        | GAG TCT TCT AAC CGA GGT CGA AAC    | 1,000 bp            | This study    |
| Influenza B   |                |             |                       |                                    |                     |               |
| Yamagata      | Hemagglutinin  | BYf226      | First PCR             | ACA CCT TCT GCG AAA GCT TCA        | 284 bp              | WHO (2021)    |
|               |                | BYr613      | First PCR             | CAT AGA GGT TCT TCA TTT GGG TT     |                     | WHO (2021)    |
|               |                | BYf226n     | Nested PCR            | CTA TAA TGC ACG ACA GAA CAA        | 209 bp              | This study    |
|               |                | BYr613n     | Nested PCR            | GTT ATC TGA ATG GAA CCC            |                     | This study    |
| Victoria      | Hemagglutinin  | BVf224      | First PCR             | ACA TAC CCT CGG CAA GAG TTT C      | 388 bp              | WHO (2021)    |
|               |                | BVr507      | First PCR             | TGC TGT TTT GTT GTT GTC GTT TT     |                     | WHO (2021)    |

|         |            |                             |        |            |
|---------|------------|-----------------------------|--------|------------|
| BVf224n | Nested PCR | CTG TTA CAT CTG GGT GCT TTC | 302 bp | This study |
| BVr507n | Nested PCR | CCA AGC CAT TGT TGC GAA AAA |        | This study |

---

World Health Organization: WHO information for the molecular detection of influenza viruses. February 2021.

[https://cdn.who.int/media/docs/default-source/influenza/molecular-detection-of-influenza-viruses/protocols\\_influenza\\_virus\\_detection\\_feb\\_2021.pdf?sfvrsn=df7d268a\\_5](https://cdn.who.int/media/docs/default-source/influenza/molecular-detection-of-influenza-viruses/protocols_influenza_virus_detection_feb_2021.pdf?sfvrsn=df7d268a_5).

WWTP 1

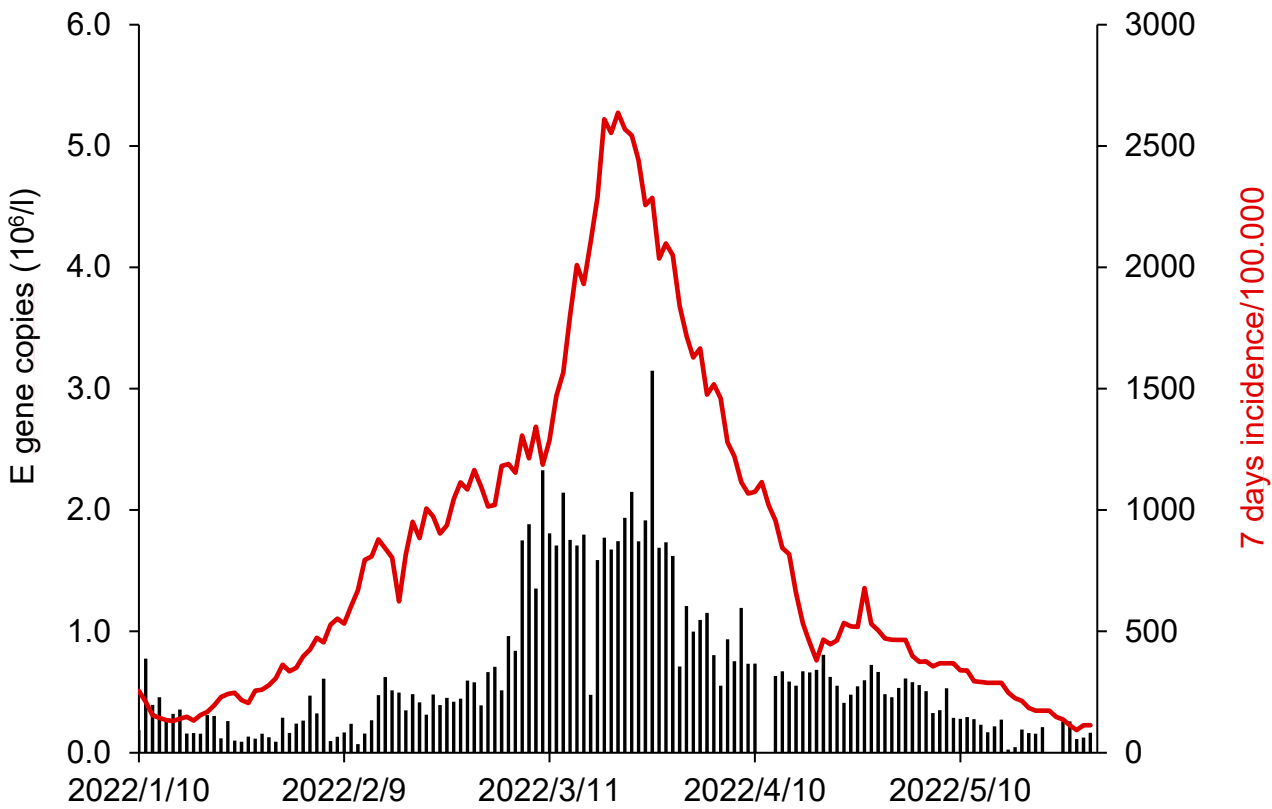

WWTP 2

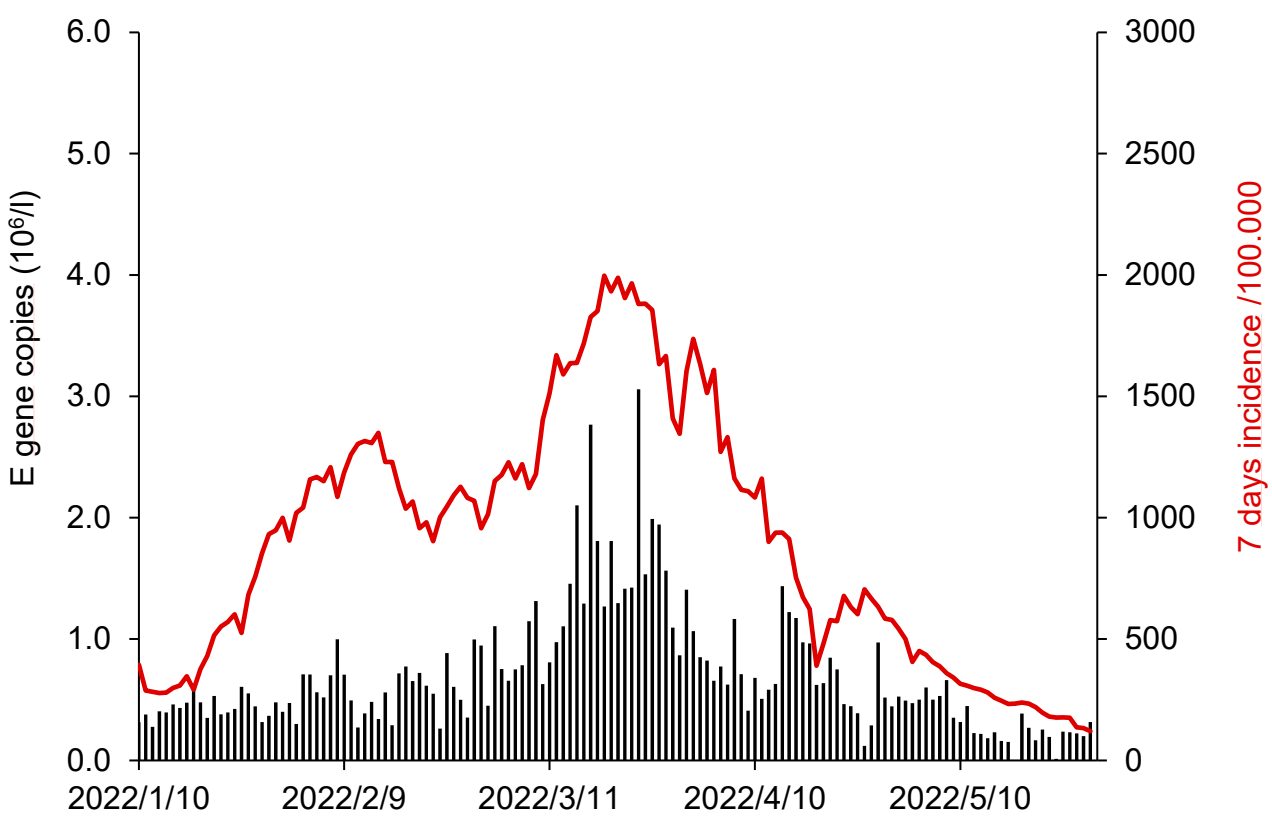

**Figure S1.** Concentration of SARS-CoV-2 in the wastewater and corresponding incidence of SARS-CoV-2 infections in the population served by WWTPs 1 and 2 (according to the data in the national database of the Robert-Koch-Institut, Berlin, Germany; [https://www.rki.de/DE/Content/InfAZ/N/Neuartiges\\_Coronavirus/Daten/Fallzahlen\\_Kum\\_Tab.html](https://www.rki.de/DE/Content/InfAZ/N/Neuartiges_Coronavirus/Daten/Fallzahlen_Kum_Tab.html)).

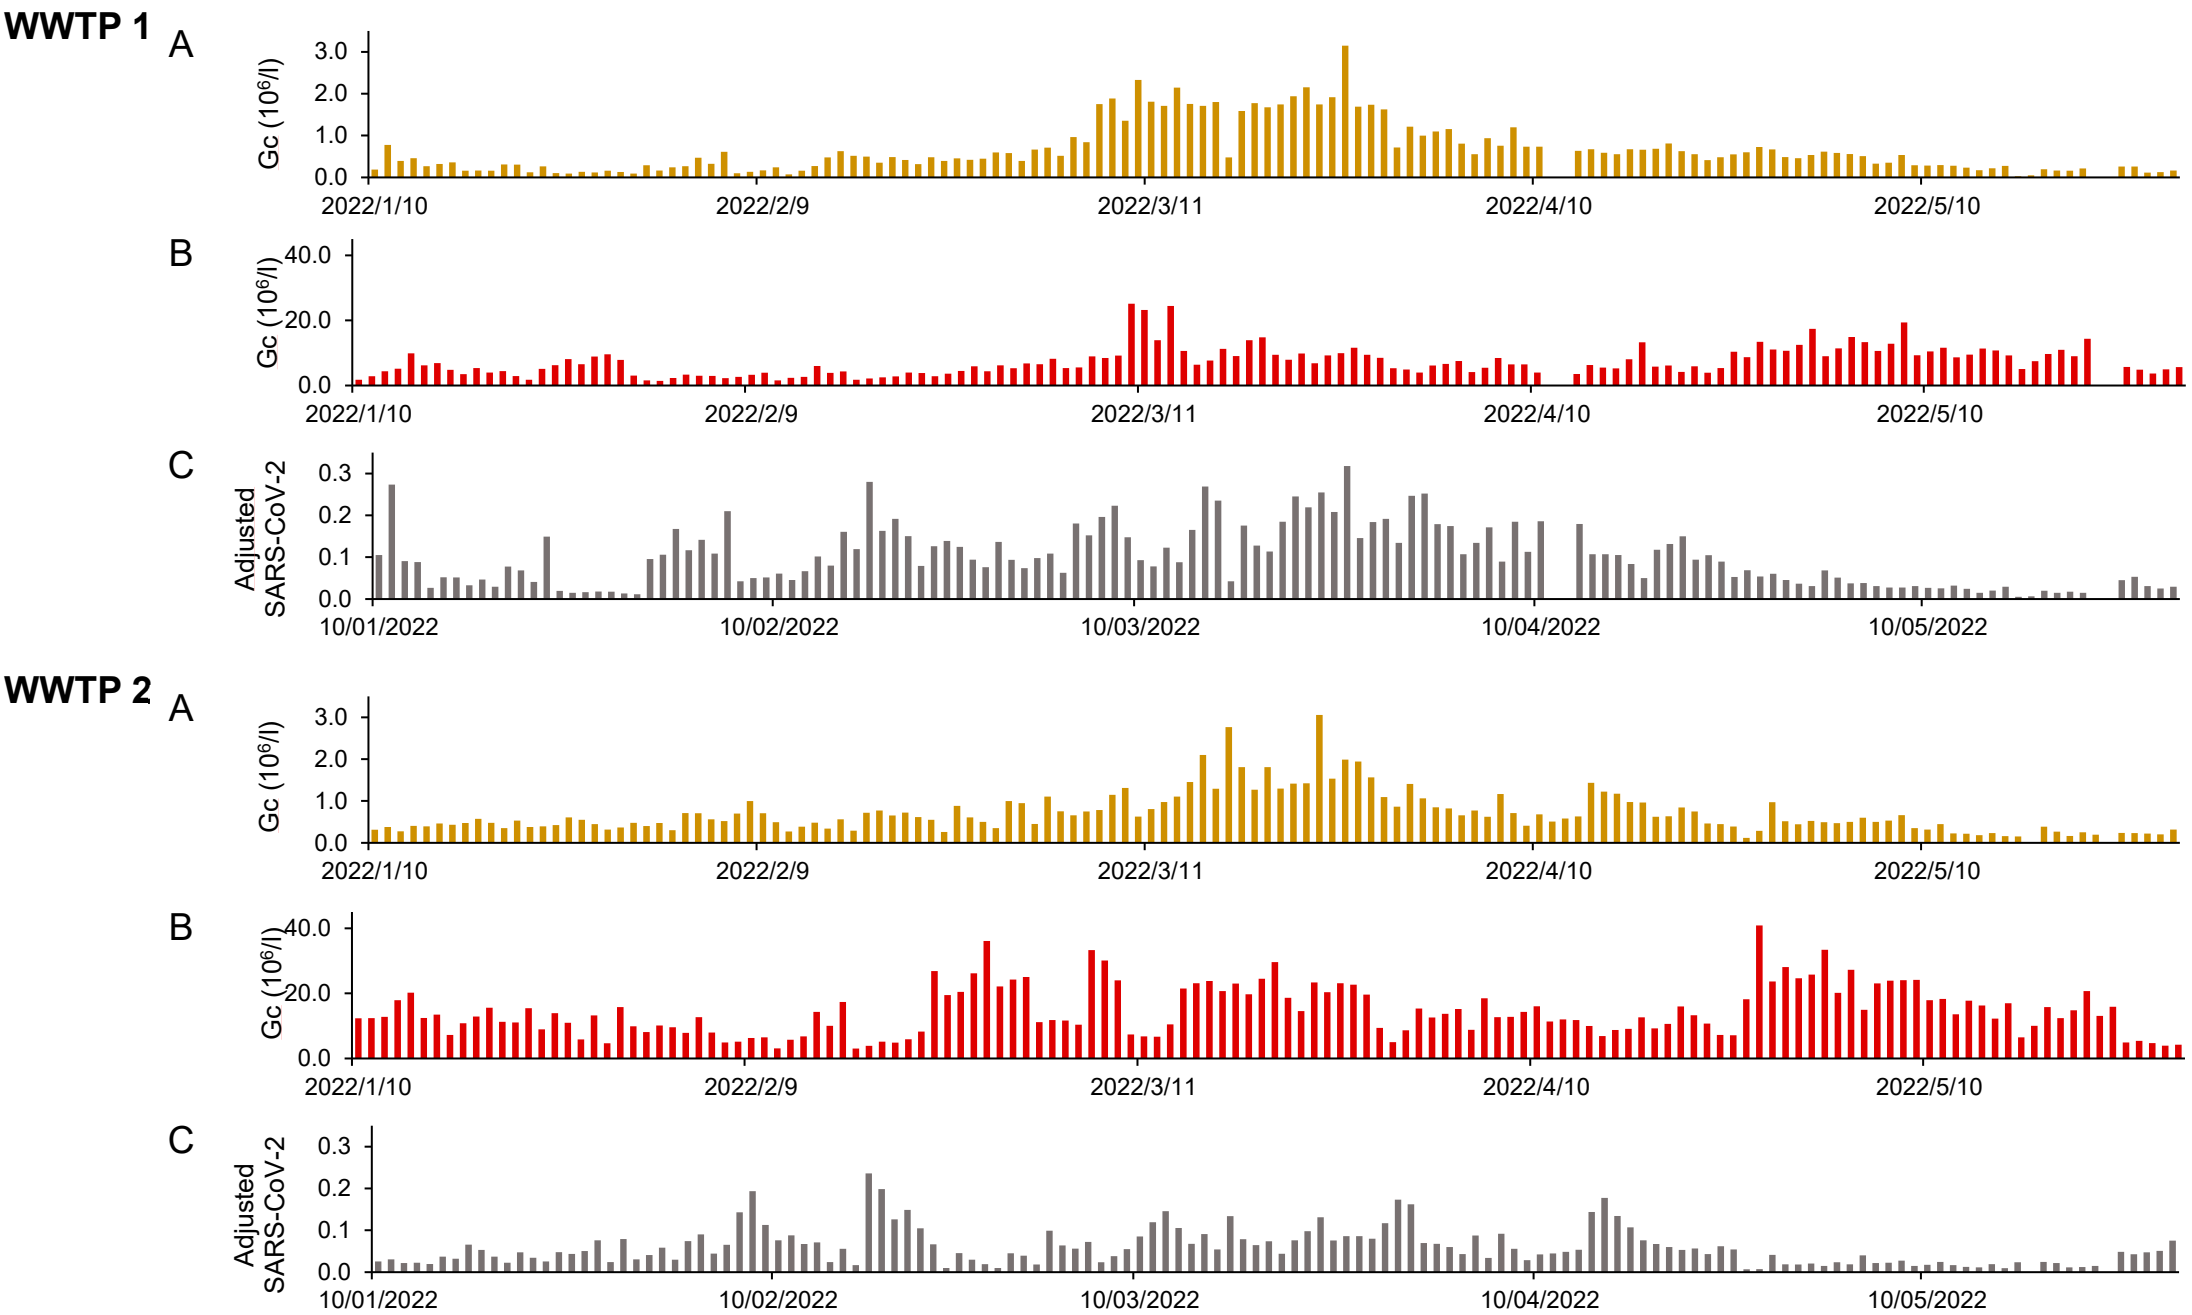

**Figure S2.** Concentration of SARS-CoV-2 (E gene; A), of crAssphage (B) and crAssphage-adjusted concentrations of SARS-CoV-2 (SARS-CoV-2 E gene gc / crAssphage gc; C) in wastewater of WWTPs 1 and 2.

**Figure S3.** Standard curves of real-time PCR for detection of influenza virus A and B (Influenza Screen & Type RT-PCR kit 4.0; Altona Diagnostics) after testing 1:4 dilutions (5 parallels per dilution) of standard (AccuPlex Flu A/B and RSV verification kit; LGC Seracare).

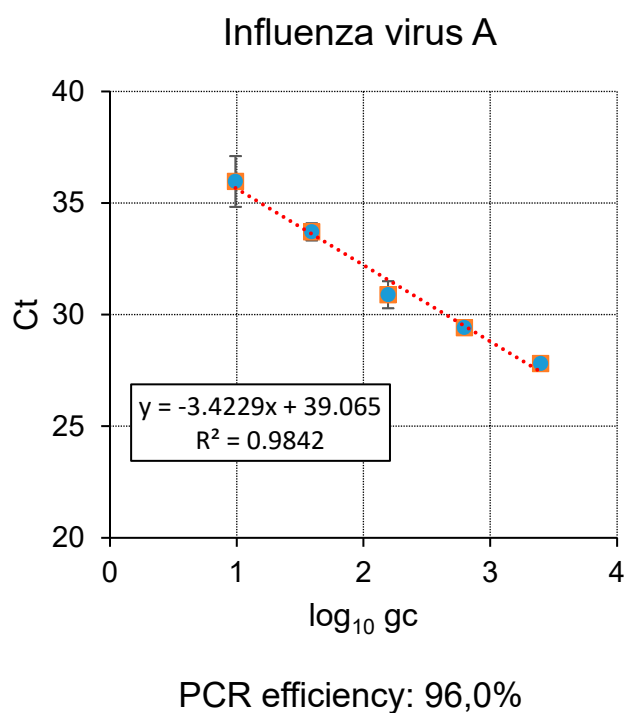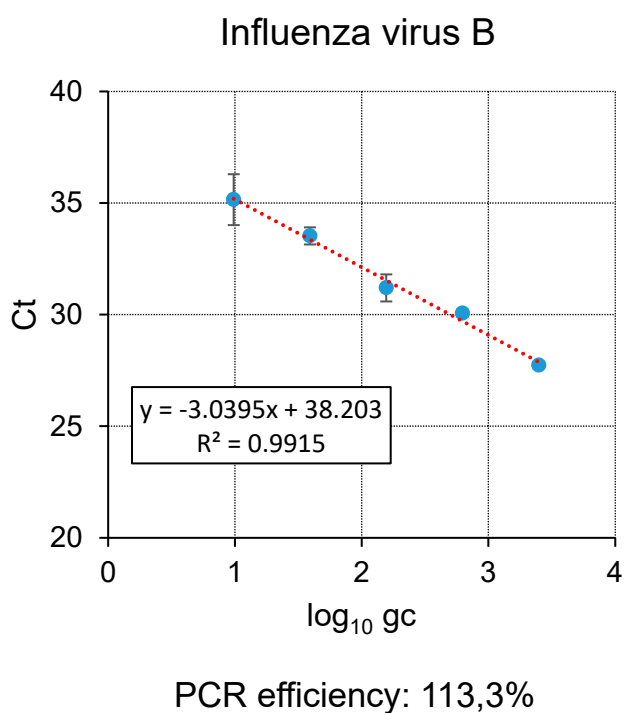

Supplement: s1 [file s1]
